# Supplementary material for: Benzylidene insertion reactions in organoplatinum chemistry: mechanism and selectivity
Source: Royal Society of Chemistry journal article supplement (doi:10.1039/d6ra02340a), 2026-04-21
Supplement: d6ra02340a2.pdf [file d6ra02340a2.pdf]

Benzylidene Insertion Reactions in Organoplatinum Chemistry: Mechanism and Selectivity

Mohamed E. Moustafa, Paul D. Boyle, Richard J. Puddephatt\*

*Department of Chemistry, University of Western Ontario, London, N6A 5B7, Canada*

***Supporting Information***

***Figures S1-S13: NMR spectra of the complexes***

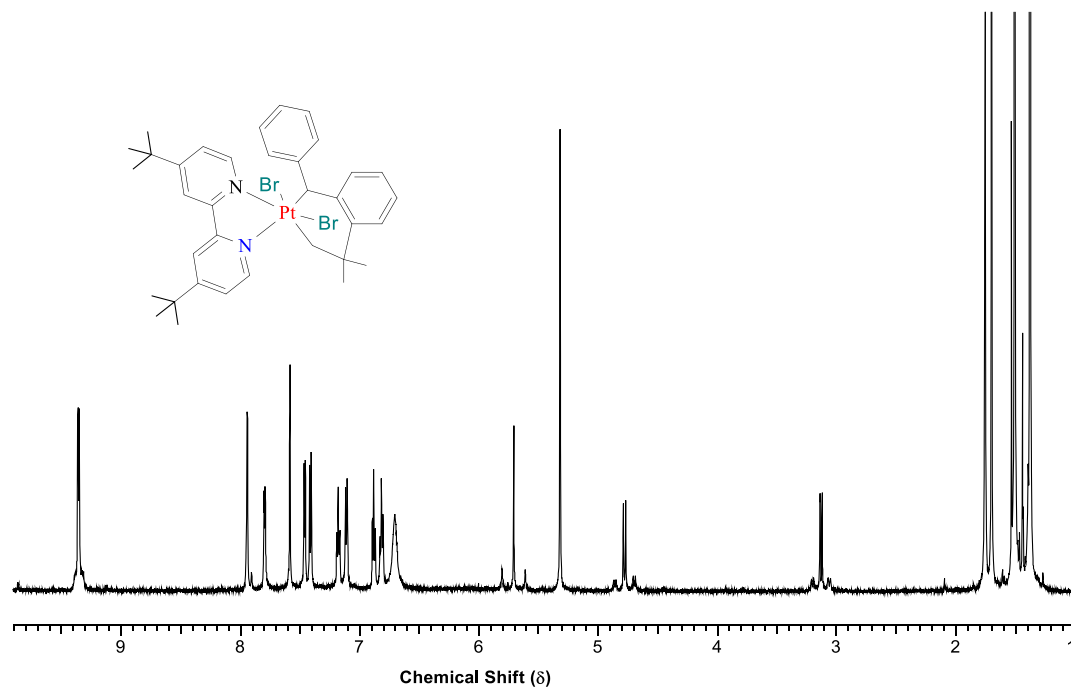

Figure S1:  $^1\text{H}$  NMR spectrum of complex **3** in  $\text{CD}_2\text{Cl}_2$ .

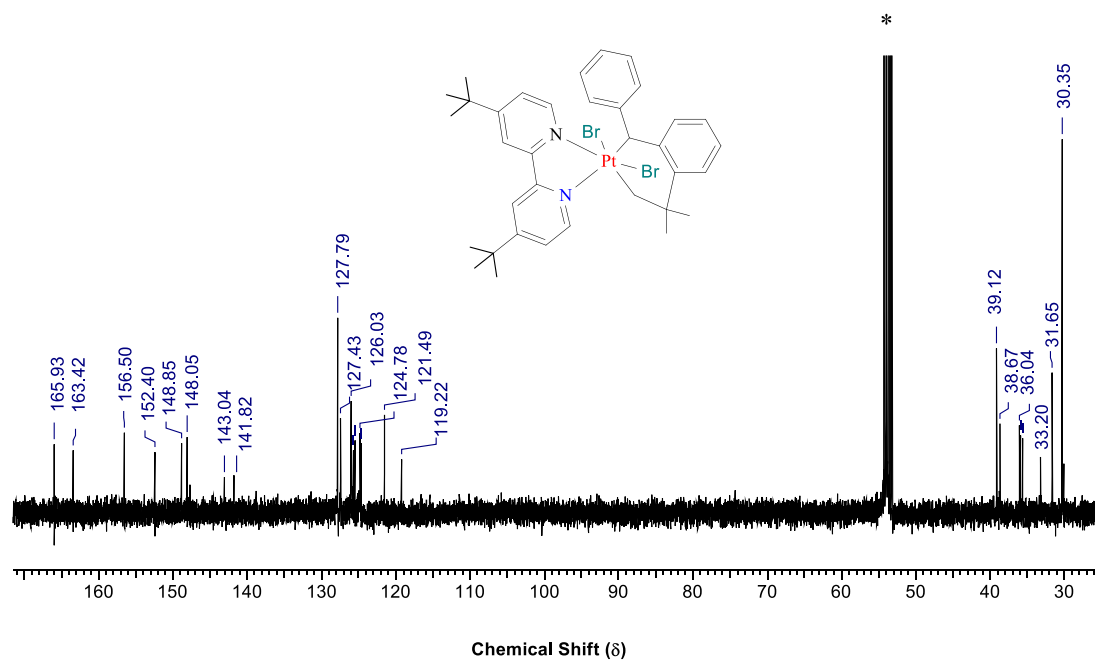

Figure S2:  $^{13}\text{C}$  NMR spectrum of complex 3 in  $\text{CD}_2\text{Cl}_2$ .

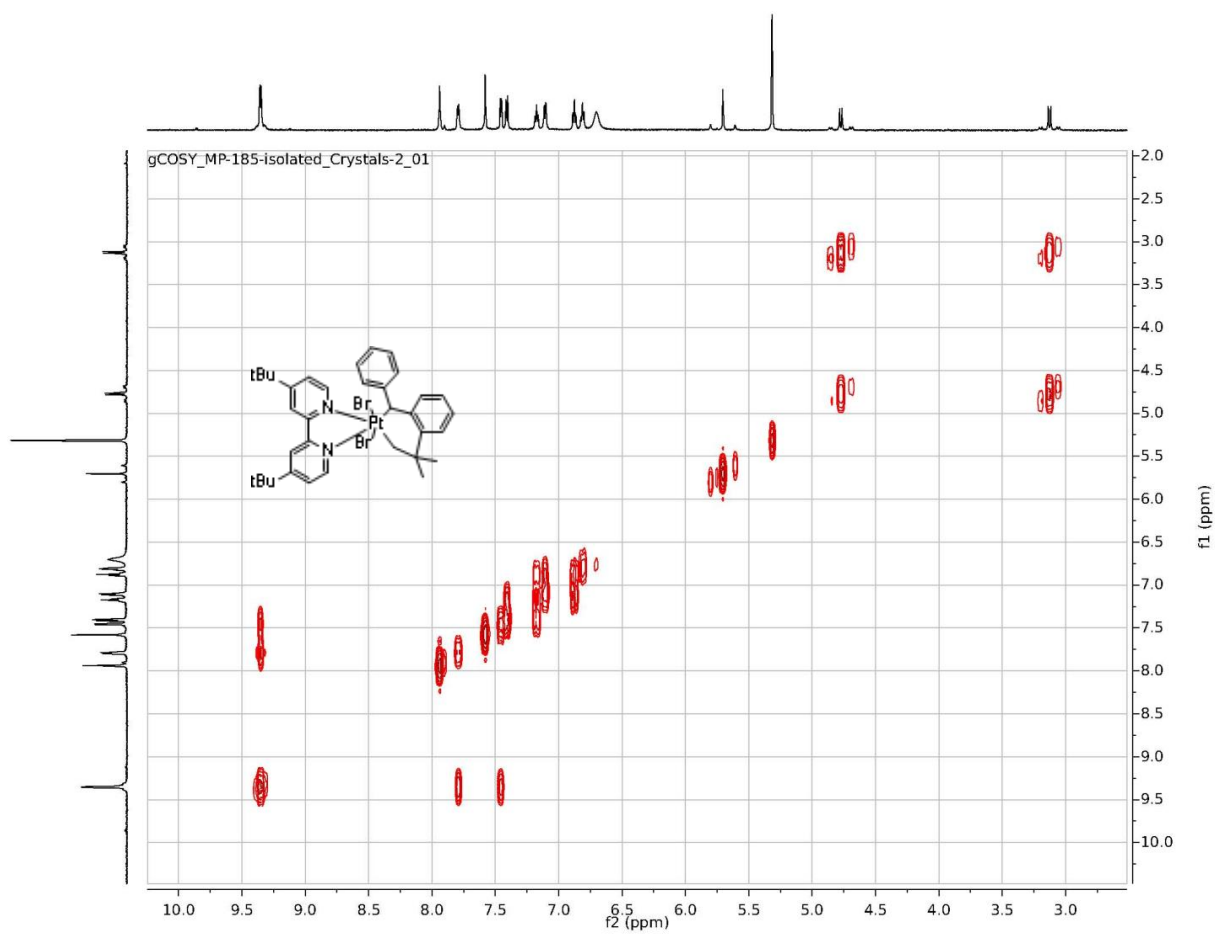

Figure S3:  $^1\text{H}$ - $^1\text{H}$  COSY spectrum of complex **3** in  $\text{CD}_2\text{Cl}_2$ .

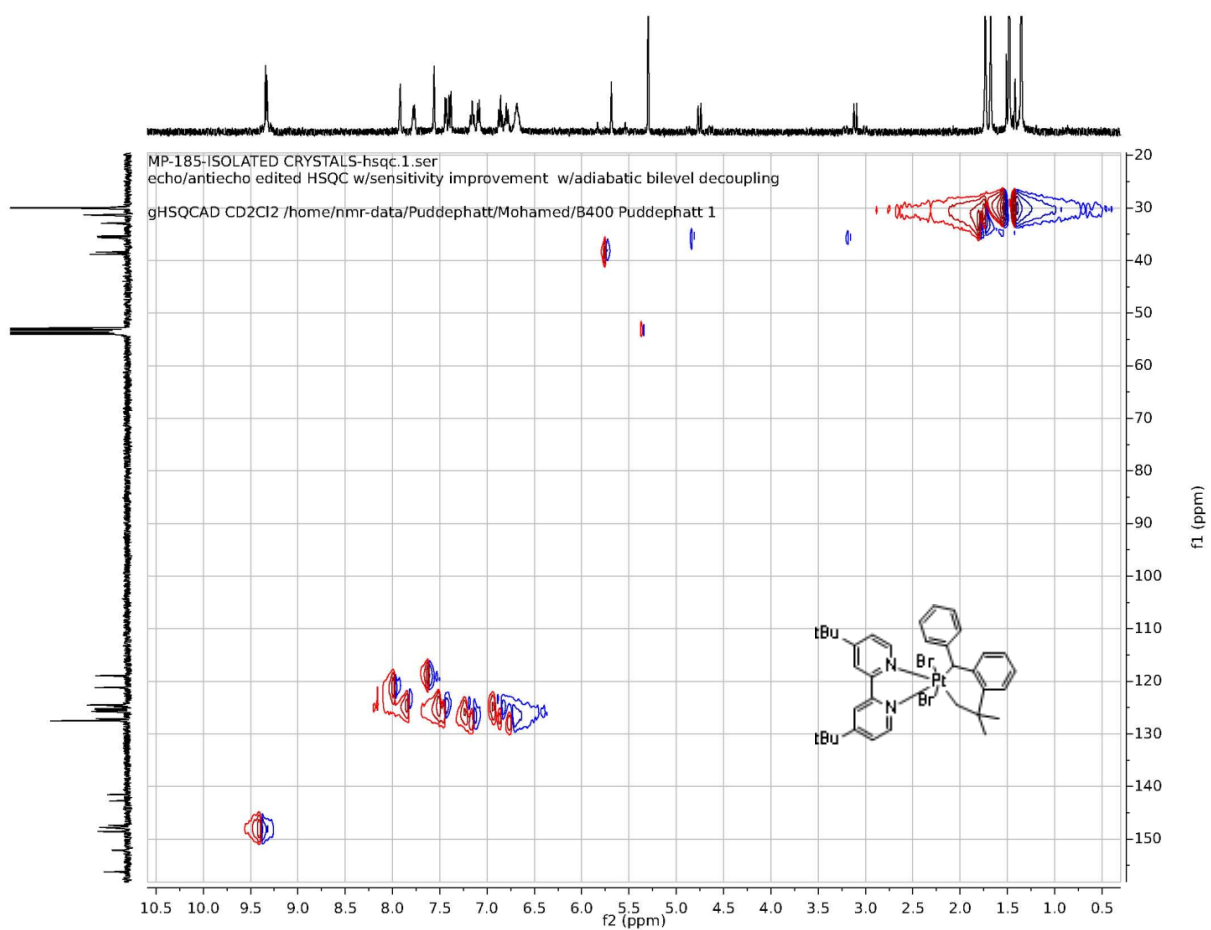

Figure S4:  $^1\text{H}$ - $^{13}\text{C}$  HSQC spectrum of complex **3** in  $\text{CD}_2\text{Cl}_2$ .

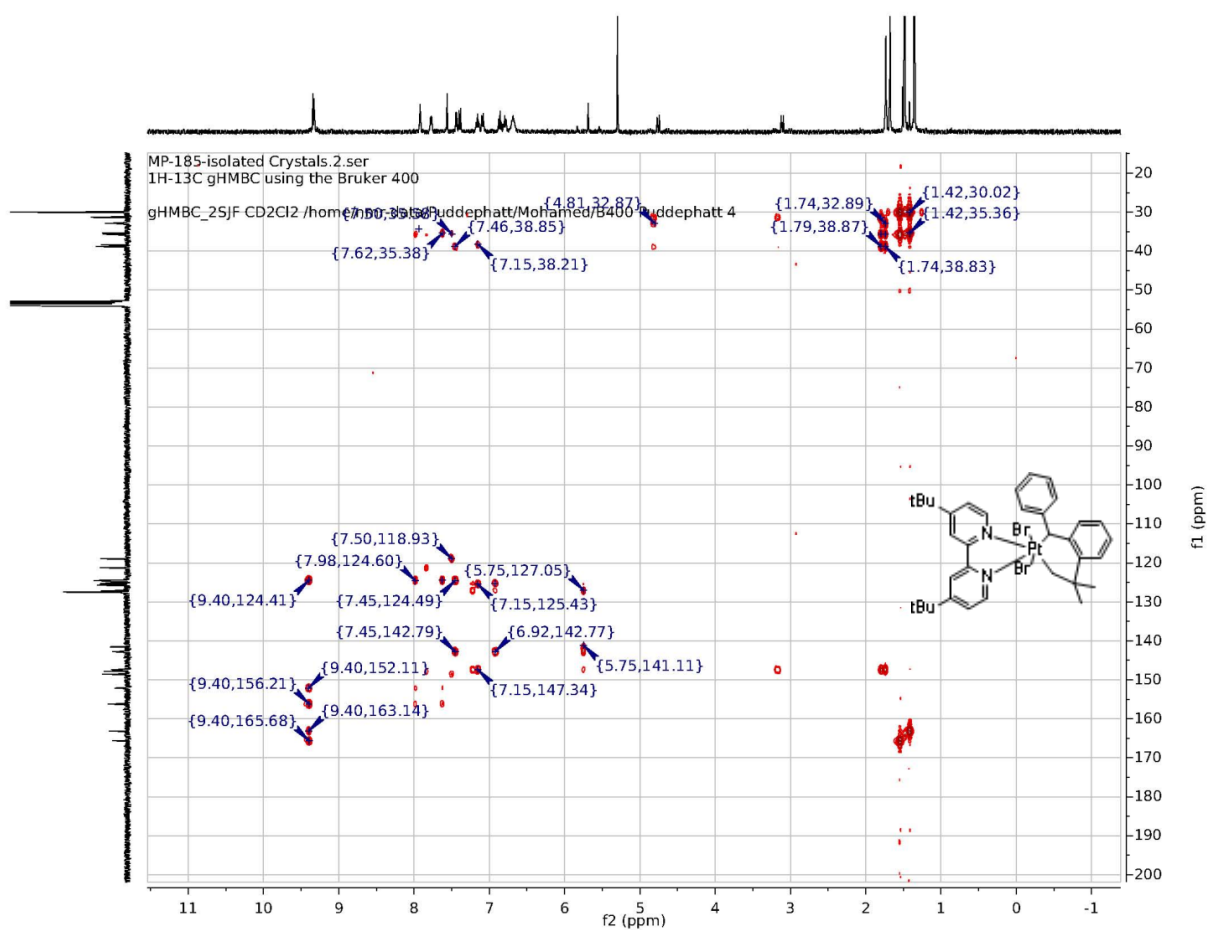

Figure S5:  $^1\text{H}$ - $^{13}\text{C}$  HMBC spectrum of complex **3** in  $\text{CD}_2\text{Cl}_2$ .

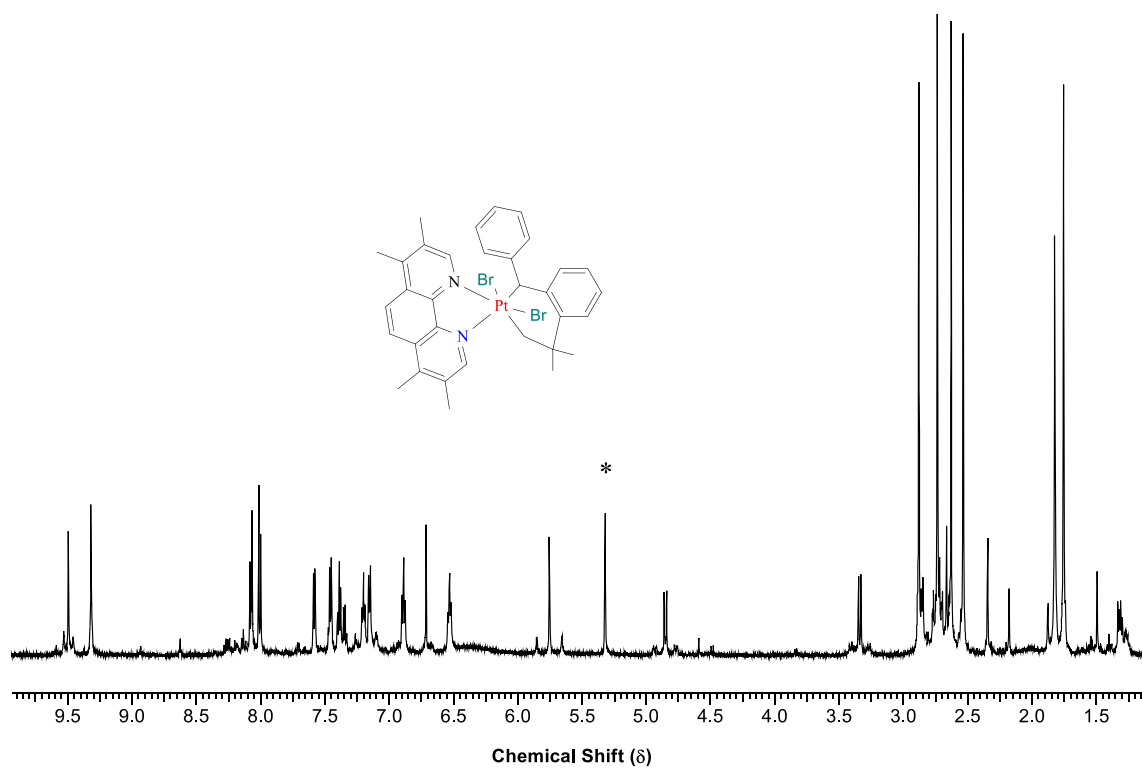

Figure S6:  $^1\text{H}$  NMR spectrum of complex **4** in  $\text{CD}_2\text{Cl}_2$ .

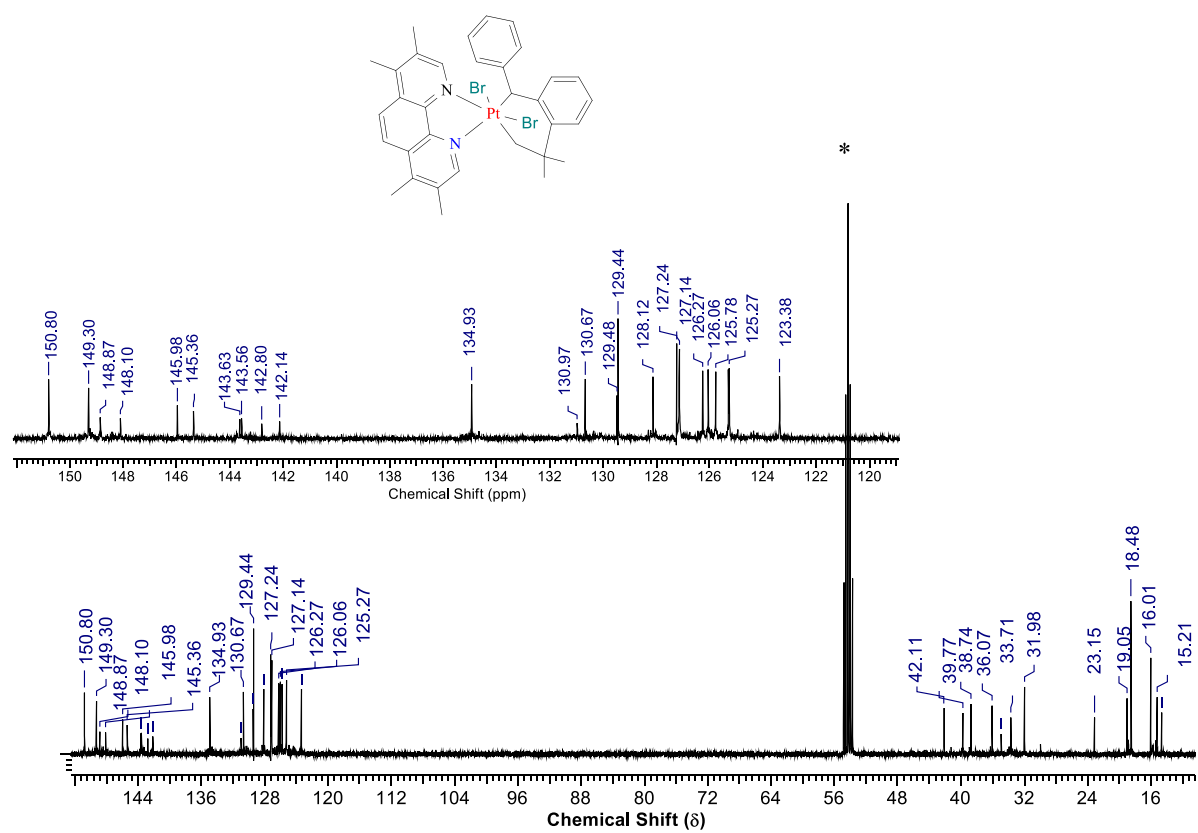

Figure S7: <sup>13</sup>C NMR spectrum of complex 4 in CD<sub>2</sub>Cl<sub>2</sub>.

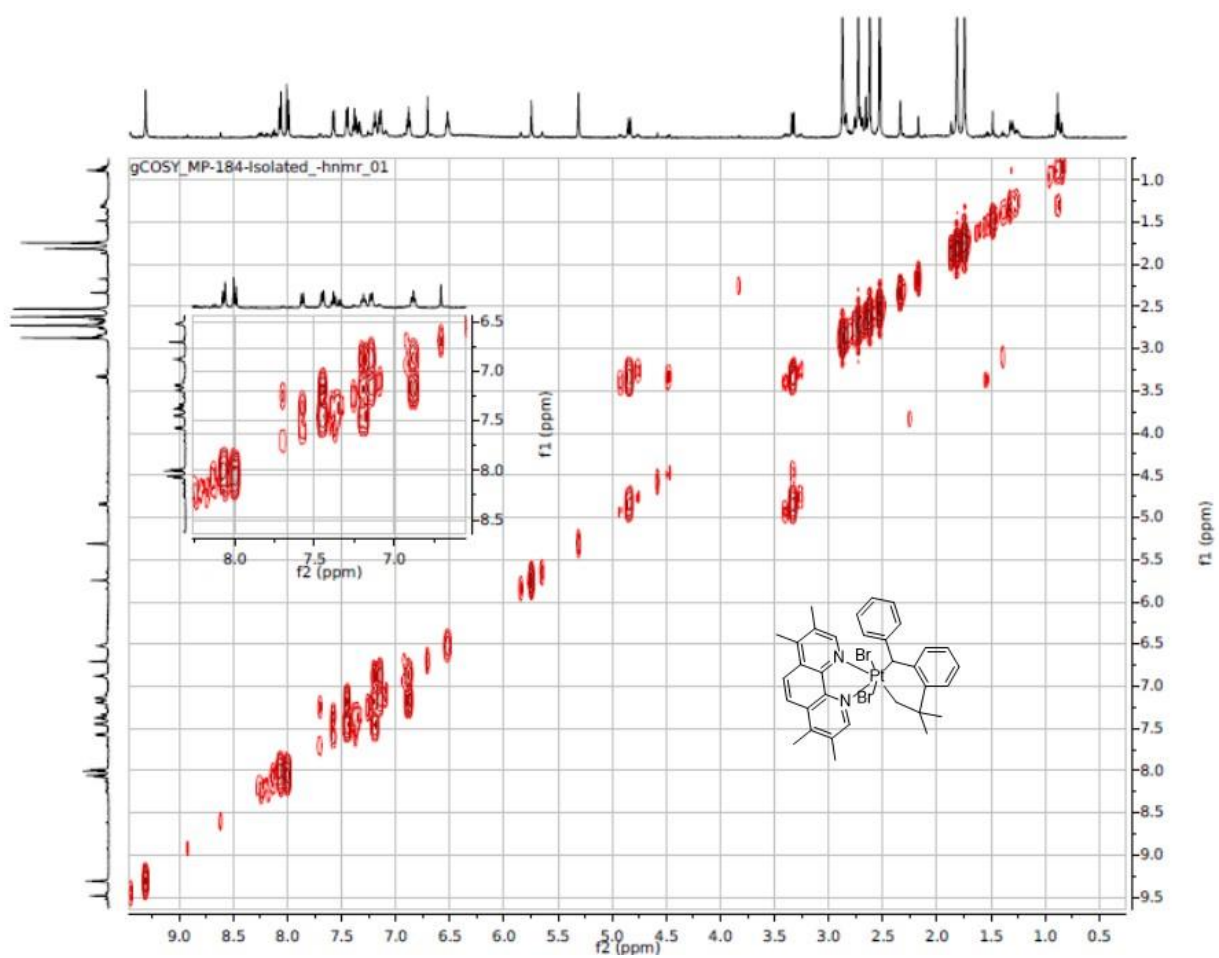

Figure S8:  $^1\text{H}$ - $^1\text{H}$  COSY spectrum of complex 4 in  $\text{CD}_2\text{Cl}_2$ .

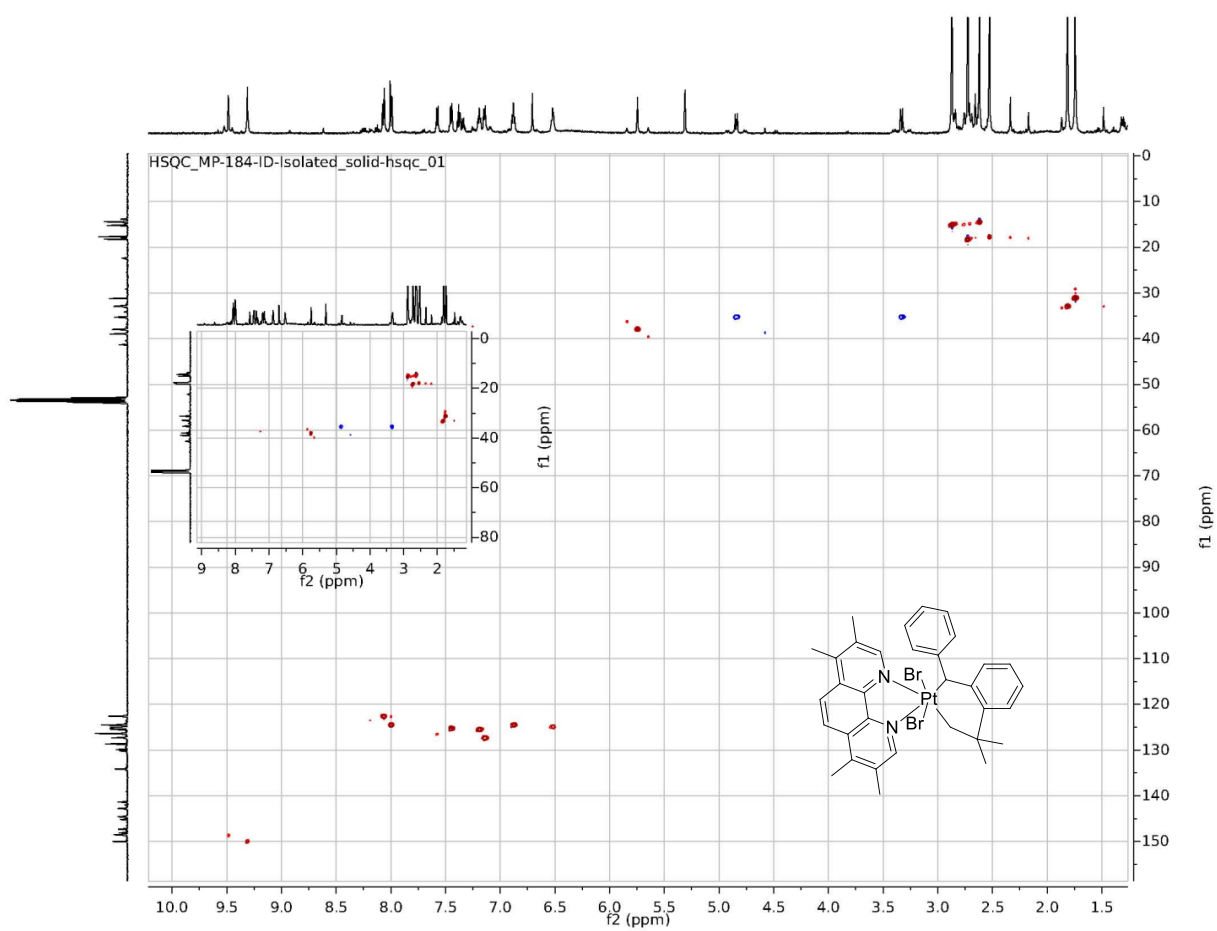

Figure S9:  $^1\text{H}$ - $^{13}\text{C}$  HSQC spectrum of complex **4** in  $\text{CD}_2\text{Cl}_2$ .

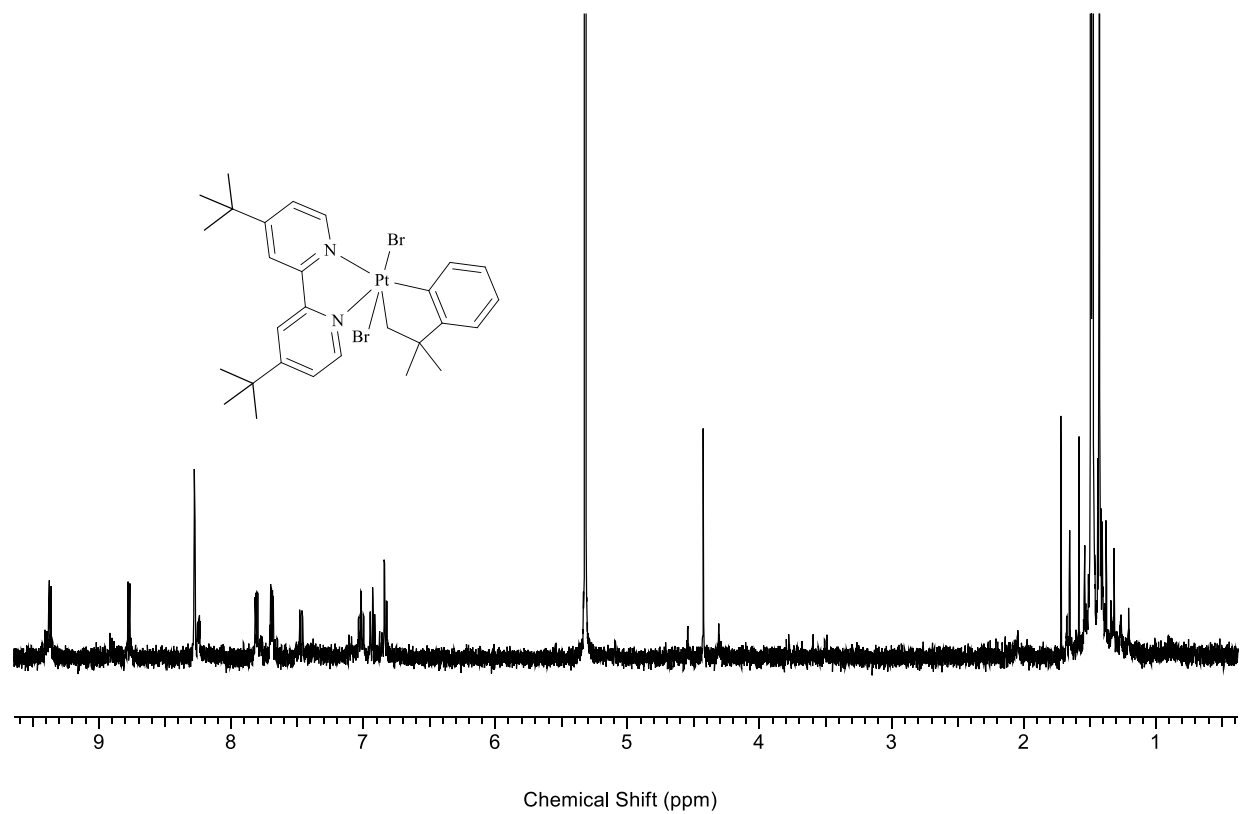

Figure S10:  $^1\text{H}$ NMR spectrum of complex **7** in  $\text{CD}_2\text{Cl}_2$ .

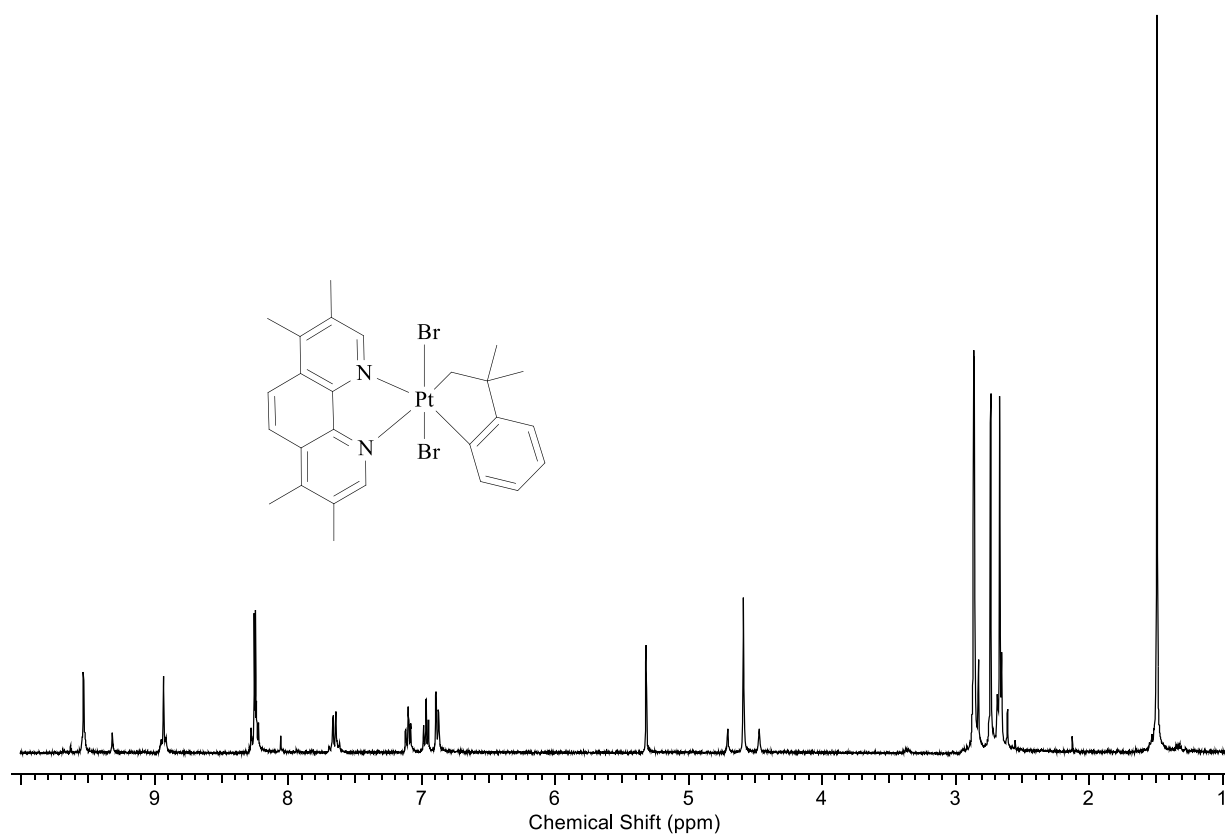

Figure S11:  $^1\text{H}$ NMR spectrum of complex **8** in  $\text{CD}_2\text{Cl}_2$ .

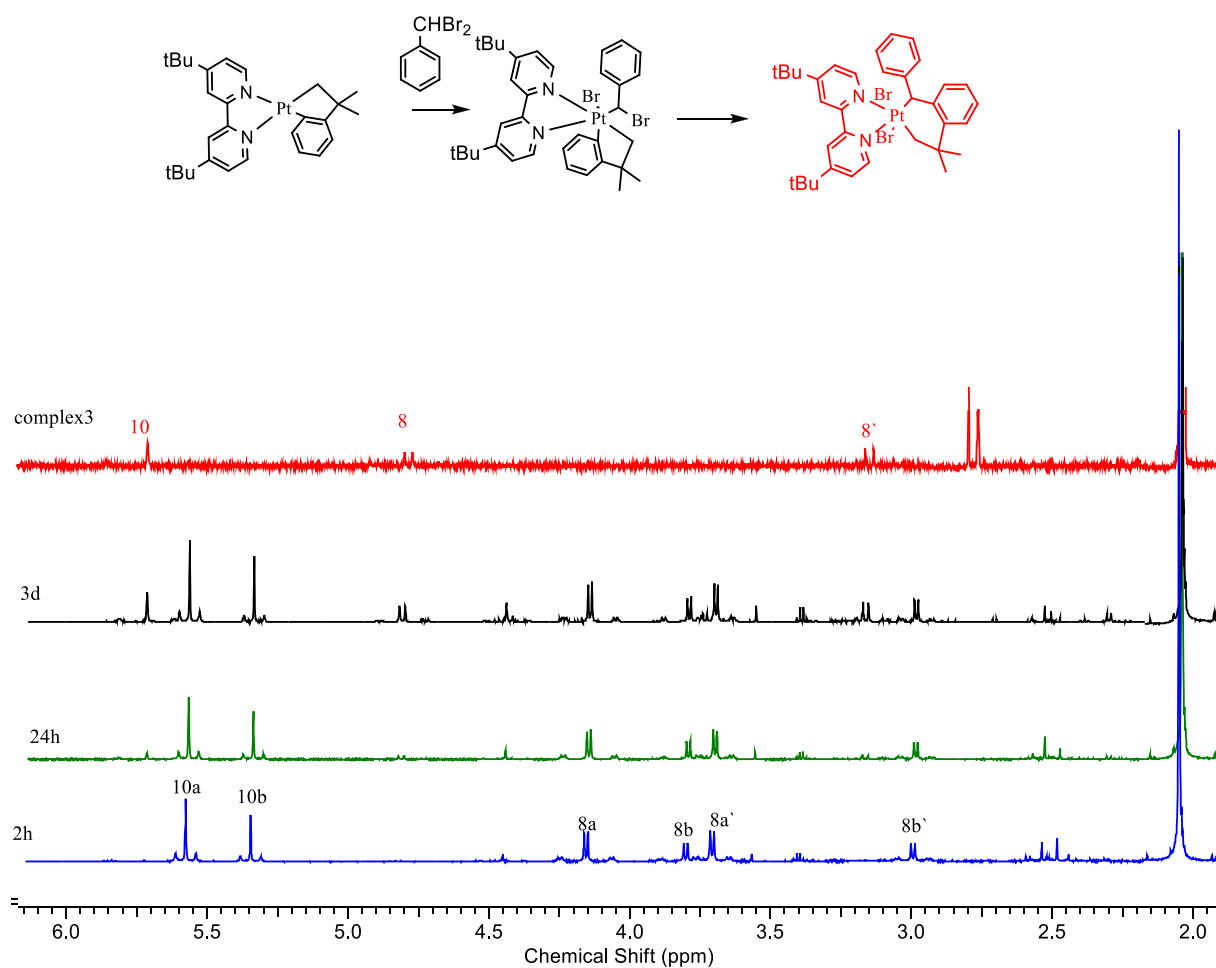

Figure S12.  $^1\text{H NMR}$  spectra (Pt-CH<sub>2</sub> region): Monitoring of formation of complex 3 from 5

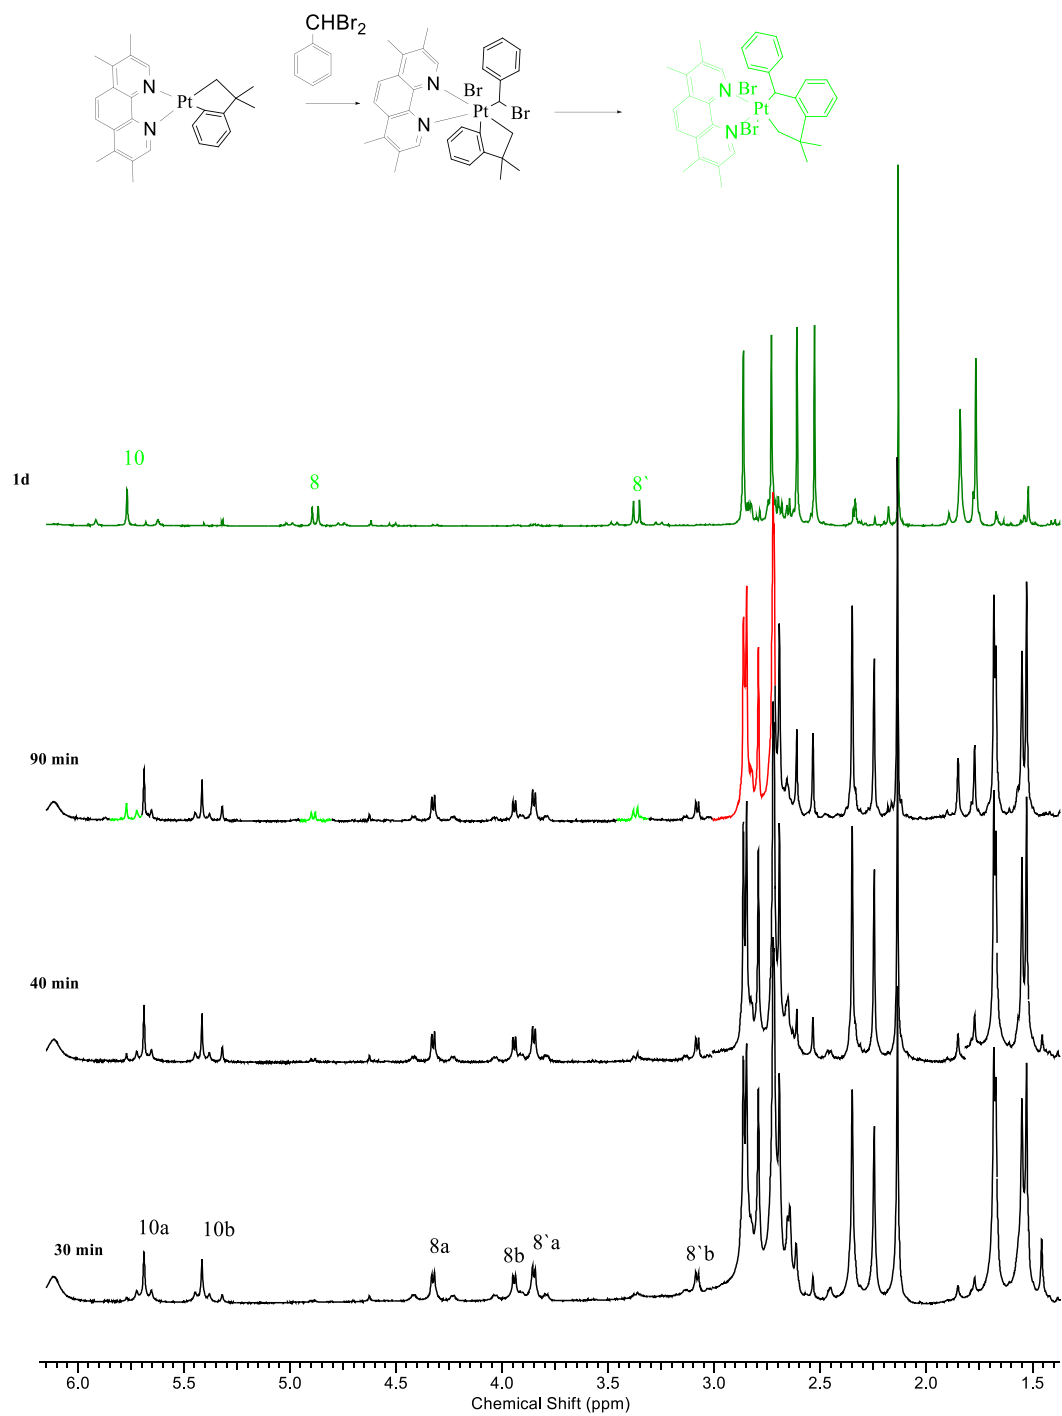

Figure S13.  $^1\text{H}$  NMR spectra (Pt- $\text{CH}_2$  region): Monitoring of formation of complex **4** from **6**
